# Supplementary material for: Clinical Requirements of Future Patient Monitoring in the Intensive Care Unit: Qualitative Study
Source: PubMed Central journal article supplement (PMC6658223; doi:10.2196/13064), 2019-04-30
Supplement: medinform_v7i2e13064_app1.pdf [file medinform_v7i2e13064_app1.pdf]

Appendix 1: table of codes

|                                                                      |
|----------------------------------------------------------------------|
| <b>Demographic Data</b>                                              |
| <b>Sex</b>                                                           |
| female                                                               |
| male                                                                 |
| <b>IT affinity</b>                                                   |
| nursing staff                                                        |
| respiratory therapist                                                |
| physician                                                            |
| <b>Work experience on ICU</b>                                        |
| nursing staff                                                        |
| respiratory therapist                                                |
| physician                                                            |
| <b>Perceived Barriers to Implementation</b>                          |
| <b>No time for training</b>                                          |
| <b>Digital infrastructure lacks functionality</b>                    |
| <b>Many external nurses - much time for training with new system</b> |
| <b>Communication problems</b>                                        |
| <b>Clinical decision support systems (CDSS)</b>                      |
| difficult to understand technology                                   |
| no clear benefit perceived                                           |
| technology not reliable                                              |
| fear to lose clinical skills                                         |
| satisfied with existing solution                                     |
| <b>Remote patient monitoring (RPM)</b>                               |
| clinical skills better than monitoring                               |
| trust in colleagues more than RPM                                    |
| less direct contact with patients                                    |
| not thinking about problem solution                                  |
| skepticism                                                           |
| increased workload                                                   |
| already satisfied with available system                              |
| no clear benefit perceived                                           |
| less distance, more stress                                           |
| no trust in new monitoring solutions                                 |
| <b>Current patient monitoring (PM)</b>                               |
| <b>Environmental Factors</b>                                         |

|                                                            |
|------------------------------------------------------------|
| architecture of ICU                                        |
| long distances                                             |
| <b>Usability PM</b>                                        |
| <b>Task-specific</b>                                       |
| <b>Central Monitor</b>                                     |
| usability                                                  |
| task-specific                                              |
| technical                                                  |
| more monitors needed                                       |
| <b>Monitoring other patients from bedside PM</b>           |
| useful                                                     |
| patient identification difficult                           |
| <b>Trendanalysis</b>                                       |
| <i>Purpose</i>                                             |
| special questions                                          |
| overview                                                   |
| <i>Usage</i>                                               |
| daily                                                      |
| seldom                                                     |
| Only additionally to Patient Data Management System (PDMS) |
| no use                                                     |
| using trends in PDMS                                       |
| better visualization                                       |
| more contact to PDMS than PM                               |
| <b>Resp. Monitoring</b>                                    |
| respiratory weaning                                        |
| spO2 is not sufficient for respiratory monitoring          |
| usage of PM and respiratory device                         |
| <b>Alarm Management</b>                                    |
| <i>Responsibilities</i>                                    |
| <i>Problems</i>                                            |
| mental issues                                              |
| alarm fatigue                                              |
| stress                                                     |
| communication problems                                     |
| too many alarms                                            |
| reasons                                                    |
| technical reasons                                          |

|                                                 |
|-------------------------------------------------|
| patient-related                                 |
| poor alarm hygiene                              |
| lack of training (false alarm limits)           |
| lack of resources                               |
| <i>Alarm thresholds</i>                         |
| check ECG alarm retrospective                   |
| active change of thresholds                     |
| frequency                                       |
| regularly                                       |
| once per shift                                  |
| seldom                                          |
| reason                                          |
| user-oriented                                   |
| patient or situation oriented                   |
| change of therapy                               |
| <b><i>Routine PM</i></b>                        |
| daily usage                                     |
| <b>Technical</b>                                |
| <b><i>Measurement inaccuracies</i></b>          |
| ECG measurement error                           |
| spO2 not possible for shock patients            |
| artifacts in the respiratory curve              |
| CO2 measurement error-prone                     |
| <b><i>Auditive alarms</i></b>                   |
| alarm prioritization (importance)               |
| <b><i>Hardware</i></b>                          |
| entanglement of cables negative                 |
| respiratory rate through ECG not possible       |
| touchscreen                                     |
| touchscreen useful                              |
| remote controller                               |
| useful                                          |
| battery empty                                   |
| monitor                                         |
| monitor reflects                                |
| <b><i>Visualization</i></b>                     |
| <i>Other medical hardware for visualization</i> |
| respirator                                      |

|                                                        |
|--------------------------------------------------------|
| <i>Design</i>                                          |
| good                                                   |
| used to this design                                    |
| color                                                  |
| font                                                   |
| uniform                                                |
| good overview                                          |
| <i>Graphic visualization</i>                           |
| optimum scale problem                                  |
| number alone is sufficient                             |
| graphic vs numeric visualization                       |
| graph important for clinical assessment                |
| validity of measurement                                |
| respiratory rate curve for respiratory assessment      |
| loops for respiratory assessment                       |
| faster and better visualization of trends              |
| <b>Compatibility with other hardware</b>               |
| small monitor for transports                           |
| PDMS                                                   |
| ventilator                                             |
| <b>System settings</b>                                 |
| <i>Individual setting options</i>                      |
| visualization                                          |
| display: parameter                                     |
| curve display / amplitude                              |
| <i>Good basic settings</i>                             |
| <i>Advanced functions difficult to set</i>             |
| individual adaptation to the specialist field not well |
| settings take too much time                            |
| <i>Parameters (see also Future: concrete wishes)</i>   |
| frequently used parameters                             |
| important parameters are missing (subject-specific)    |
| <b>Intuitiveness and simplicity</b>                    |
| <b>Future PM</b>                                       |
| <b>Social Factors</b>                                  |
| education of staff                                     |
| enhance team communication                             |
| more helpers for nurses                                |

|                                                          |
|----------------------------------------------------------|
| <b>Usability PMS</b>                                     |
| <b>Usability and intuitiveness</b>                       |
| modular system with complex functions more hidden        |
| more functionality for more training time                |
| usability more important                                 |
| usability important for emergency                        |
| usability requirements individually different            |
| individually different number of functions               |
| less training, more functions                            |
| <b>Technical</b>                                         |
| better transmission of data, interoperability of devices |
| alarm management                                         |
| different alarm tones for different parameters           |
| wireless                                                 |
| wireless useful                                          |
| for transports                                           |
| enhance mobility of patients                             |
| comfort for patient                                      |
| less artifacts                                           |
| wireless for patient bedding                             |
| visualization                                            |
| relevant parameters get bigger in size                   |
| all parameters in one monitor                            |
| visualisation at bedside important                       |
| non-invasive                                             |
| required parameters for general monitoring               |
| etCO2 validated                                          |
| modular system with all available parameters             |
| BIS                                                      |
| non-invasive cardiac index                               |
| depth of breath                                          |
| no need for more parameters                              |
| etCO2 for non-intubated patients                         |
| <b>Task-specific</b>                                     |
| <b>Remote Control</b>                                    |
| less patient contact                                     |
| respiratory device                                       |
| remote control of PM                                     |

|                                                         |
|---------------------------------------------------------|
| useful when alarm cry                                   |
| less workload                                           |
| <b>Remote PM</b>                                        |
| usability remote PM                                     |
| <i>Task-specific</i>                                    |
| patient-oriented                                        |
| for noise reduction at bed-side                         |
| increase of patient safety                              |
| monitoring non-ICU patients for fast track              |
| weaning                                                 |
| critically ill                                          |
| known patients                                          |
| staff and resources                                     |
| wireless PM for ward rounds                             |
| for less alarm fatigue                                  |
| forwarding alarm to doctor                              |
| direct information about alarm reason                   |
| filtering alarms through nurse                          |
| when preparing the medication                           |
| responsible for more than one ward                      |
| remote PM from home                                     |
| remote PM from on-call room                             |
| transports                                              |
| for intervention with radioactive substances, radiation |
| CT Transport                                            |
| neighboring patient room                                |
| rural areas                                             |
| staff shortage                                          |
| for education                                           |
| tablets for handing over                                |
| will use                                                |
| not needed                                              |
| <i>Technical</i>                                        |
| Alarm management RPM                                    |
| voice alarm                                             |
| vibration alarm                                         |
| audio alarm                                             |
| only for vital alarms                                   |

|                                                        |
|--------------------------------------------------------|
| visual alarm                                           |
| video monitoring                                       |
| visualization                                          |
| graphical                                              |
| design                                                 |
| color codes for alarms                                 |
| RPM and PDMS in one system                             |
| parameter for remote PM                                |
| hardware                                               |
| projection through beamer                              |
| size of hardware                                       |
| small sized tablet                                     |
| to have free hands                                     |
| easy to transport                                      |
| remote PM on body                                      |
| middle sized tablet                                    |
| big sized tablet                                       |
| if stationary                                          |
| better overview                                        |
| smartphone better                                      |
| tablets / smartphone in ICU                            |
| tablets in danger of theft                             |
| useful                                                 |
| not useful                                             |
| no space to carry additional devices                   |
| <b><i>Clinical decision support systems (CDSS)</i></b> |
| Usability                                              |
| <i>task-specific</i>                                   |
| alarm automatic threshold query                        |
| sepsis risk assessment                                 |
| CDSS only for doctors                                  |
| automatic trend analysis                               |
| scores                                                 |
| intelligent alarm management                           |
| CDSS learns from false alarms                          |
| CDSS automatically adjusts alarm limits                |
| CDSS suggests solutions to solve alarm                 |
| alarm prioritization                                   |

|                                      |
|--------------------------------------|
| alarm filter                         |
| less interdisciplinary communication |
| pattern recognition of alarms        |
| individualization of alarms          |
| report of alarms                     |
| closed loop system in ICU            |
